# Supplementary material
Source: PubMed Central journal article supplement (PMC4269829)
Supplement: NIHMS634107-supplement-2.pdf [file NIHMS634107-supplement-2.pdf]

## Supplemental Data

**Table S1, related to Figure 1.**

**Genomic Coordinates of Mutations Identified (and Resulting Amino Acid Substitutions).**

| Amino Acid | Coding DNA Sequence | GRCh37/hg19 genome location | # primary tumor samples | Novel mutation?    | In germline? (# tumors evaluated if not all) |
|------------|---------------------|-----------------------------|-------------------------|--------------------|----------------------------------------------|
| p.R1060H   | c.3179G>A           | 2:29446388                  | 1                       | Y                  | Y                                            |
| p.T1151M   | c.3452C>T           | 2:29445273                  | 1                       | N (COSMIC)         | N                                            |
| p.M1166R   | c.3497T>G           | 2:29445228                  | 1                       | N (COSMIC)         | N                                            |
| p.I1170N   | c.3509T>A           | 2:29445216                  | 1                       | Y                  | N                                            |
| p.I1170S   | c.3509T>G           | 2:29445216                  | 1                       | N (COSMIC)         | N                                            |
| p.I1171N   | c.3512T>A           | 2:29445213                  | 2                       | N (COSMIC)         | N                                            |
| p.F1174I   | c.3520T>A           | 2:29443697                  | 2                       | N (COSMIC)         | N (1)                                        |
| p.F1174V   | c.3520T>G           | 2:29443697                  | 2                       | N (COSMIC)         | N                                            |
| p.F1174L   | c.3520T>C           | 2:29443697                  | 2                       | N (COSMIC)         | N                                            |
| p.F1174C   | c.3521T>G           | 2:29443696                  | 4                       | N (COSMIC)         | N (3)                                        |
| p.F1174S   | c.3521T>C           | 2:29443696                  | 1                       | N (COSMIC)         | Not evaluated                                |
| p.F1174L   | c.3522C>A           | 2:29443695                  | 26                      | N (COSMIC)         | N (19)                                       |
| p.F1174L   | c.3522C>G           | 2:29443695                  | 1                       | N (COSMIC)         | N                                            |
| p.I1183T   | c.3548T>C           | 2:29443669                  | 1                       | Y                  | Y                                            |
| p.L1196M   | c.3586C>A           | 2:29443631                  | 1                       | N (COSMIC)         | Not evaluated                                |
| p.A1200V   | c.3599C>T           | 2:29443618                  | 1                       | N (COSMIC)         | N                                            |
| p.L1204F   | c.3610C>T           | 2:29443607                  | 1                       | Y                  | Y                                            |
| p.R1231Q   | c.3692G>A           | 2:29436901                  | 1                       | N ( <i>dbSNP</i> ) | Y                                            |
| p.L1240V   | c.3718T>G           | 2:29436875                  | 1                       | N (COSMIC)         | Not evaluated                                |
| p.F1245I   | c.3733T>A           | 2:29436860                  | 2                       | N (COSMIC)         | N (1)                                        |
| p.F1245V   | c.3733T>G           | 2:29436860                  | 6                       | N (COSMIC)         | N (4)                                        |
| p.F1245C   | c.3734T>G           | 2:29436859                  | 6                       | N (COSMIC)         | N                                            |
| p.F1245L   | c.3735C>A           | 2:29436858                  | 1                       | N (COSMIC)         | Not evaluated                                |
| p.I1250T   | c.3749T>C           | 2:29432739                  | 1                       | N ( <i>dbSNP</i> ) | Y                                            |
| p.D1270G   | c.3809A>G           | 2:29432679                  | 1                       | Y                  | Not evaluated                                |
| p.R1275L   | c.3824G>T           | 2:29432664                  | 3                       | N (COSMIC)         | N (3)                                        |
| p.R1275Q   | c.3824G>A           | 2:29432664                  | 51                      | N (COSMIC)         | Y                                            |
| p.Y1278S   | c.3833A>C           | 2:29432655                  | 1                       | N (COSMIC)         | N                                            |
| p.G1286R   | c.3856G>C           | 2:29430119                  | 1                       | Y                  | Not evaluated                                |
| p.T1343I   | c.4028C>T           | 2:29420453                  | 1                       | Y                  | Not evaluated                                |
| p.D1349H   | c.4045G>C           | 2:29420436                  | 1                       | N ( <i>dbSNP</i> ) | Not evaluated                                |

## Wild-type-like

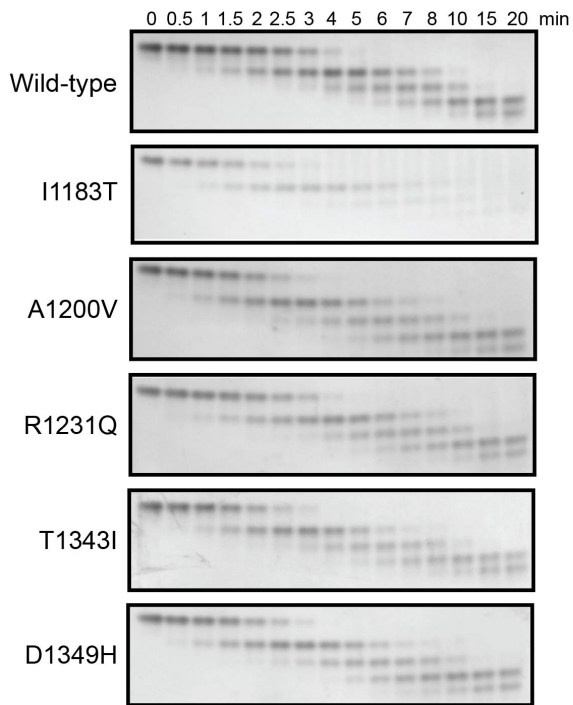

## Activating

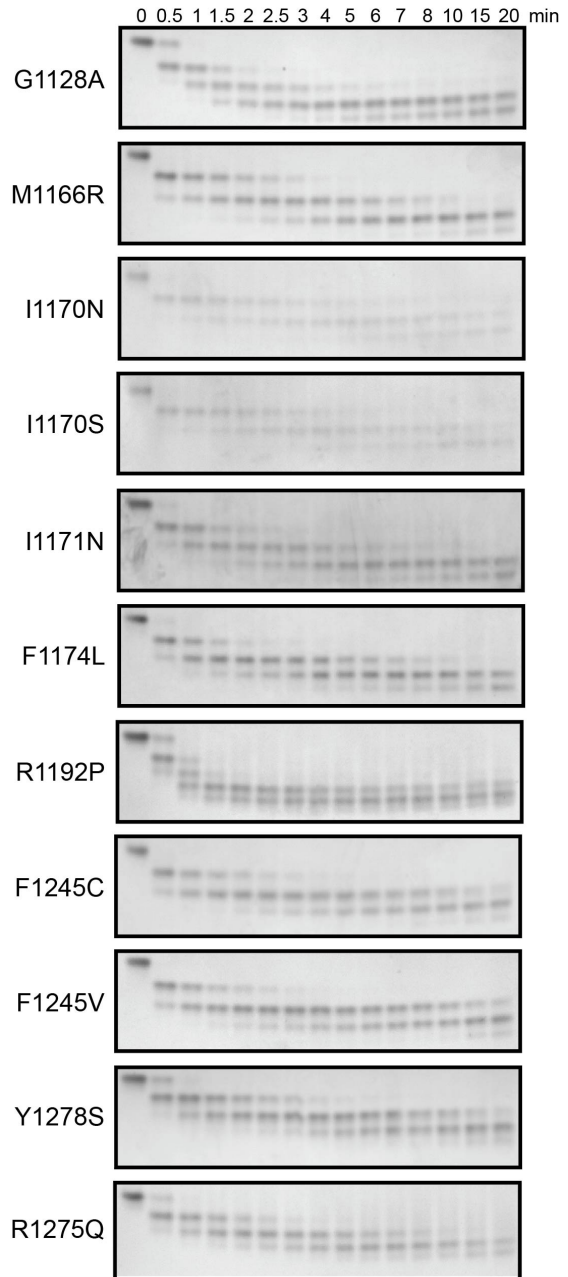

## Inactivating

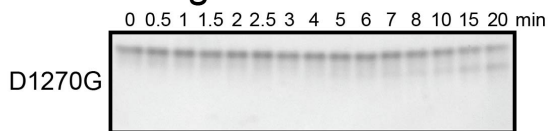

## Slightly activating

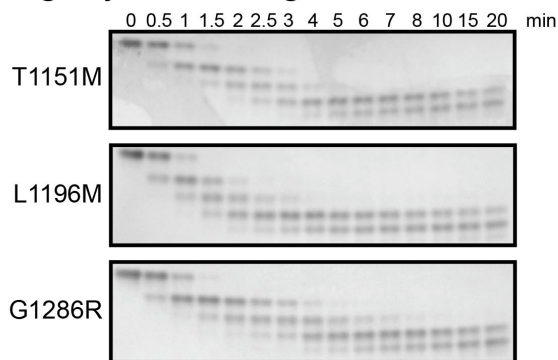

**Figure S1, related to Figure 1.  
Native Gel Analysis of ALK TKD Mutants.**

Separation of differently autophosphorylated species of ALK TKD using native gel electrophoresis illustrates the progress of autophosphorylation when 10  $\mu$ M ALK TKD (wild-type or mutated) is incubated with saturating ATP (2 mM) and 10 mM  $MgCl_2$  at 37°C. Results are representative of at least 2 independent experiments. L1204F, L1240V, and I1250T were not analyzed due to low expression levels in Sf9 cells.

**Table S2, related to Figure 2.**  
**ALK Mutation and Amplification Status by NB Risk Group and Age.**

|                           | <b>Mutation<br/>(n=126)<sup>a</sup><br/>n (%)</b> | <b>No Mutation<br/>(n=1458)<sup>a</sup><br/>n (%)</b> | <b>Amplification<br/>(n=24)<sup>b</sup><br/>n (%)</b> | <b>No Amplification<br/>(n=1310)<sup>b</sup><br/>n (%)</b> |
|---------------------------|---------------------------------------------------|-------------------------------------------------------|-------------------------------------------------------|------------------------------------------------------------|
| <b>Low risk</b>           | 38 (6)                                            | 586 (94)                                              | 0 (0)                                                 | 454 (100)                                                  |
| <b>Intermediate risk</b>  | 23 (8)                                            | 263 (92)                                              | 0 (0)                                                 | 241 (100)                                                  |
| <b>High risk</b>          | 65 (10)                                           | 595 (90)                                              | 24 (4)                                                | 604 (96)                                                   |
| <b>Unknown risk group</b> | 0                                                 | 14                                                    | 0                                                     | 11                                                         |
| <b>Age &lt;365 days</b>   | 35 (6)                                            | 529 (94)                                              | 6 (1)                                                 | 453 (99)                                                   |
| <b>Age 1-5 years</b>      | 76 (9)                                            | 755 (91)                                              | 18 (3)                                                | 689 (97)                                                   |
| <b>Age 6-10 years</b>     | 5 (5)                                             | 95 (95)                                               | 0 (0)                                                 | 84 (100)                                                   |
| <b>Age &gt;10 years</b>   | 10 (11)                                           | 79 (89)                                               | 0 (0)                                                 | 84 (100)                                                   |

<sup>a</sup>Mutation status was unknown for 12 patients.

<sup>b</sup>Amplification status was unknown for 262 patients.

**Table S3, related to Table 2.**  
**ALK Aberrations by Risk Group.**

| Patient cohort              | n (%)     | 5-year EFS <sup>a</sup><br>+/- std error | EFS <sup>a</sup><br>p value | 5-year OS <sup>b</sup><br>+/- std error | OS <sup>b</sup><br>p value |
|-----------------------------|-----------|------------------------------------------|-----------------------------|-----------------------------------------|----------------------------|
| <b>LOW-RISK</b>             |           |                                          |                             |                                         |                            |
| <b>ALK mutation</b>         |           |                                          |                             |                                         |                            |
| At least one                | 38 (6%)   | 83 ± 7.8                                 | 0.66                        | 97 ± 3.5                                | 0.75                       |
| No mutation                 | 586 (94%) | 87 ± 1.8                                 |                             | 97 ± 1.0                                |                            |
| Unknown                     | 2         |                                          |                             |                                         |                            |
| <b>Site of ALK mutation</b> |           |                                          | 0.27                        |                                         | 0.79                       |
| F1174                       | 7 (18%)   | 100                                      |                             | 100                                     |                            |
| F1245                       | 6 (16%)   | 100                                      |                             | 100                                     |                            |
| R1275                       | 18 (47%)  | 71 ± 14.4                                |                             | 94 ± 7.4                                |                            |
| Other mutation              | 7 (18%)   | 86 ± 16.2                                |                             | 100                                     |                            |
| <b>ALK Copy Number</b>      |           |                                          | < 0.0001                    |                                         | 0.0001                     |
| Amplified                   | 0 (0%)    |                                          |                             | 79 ± 10                                 |                            |
| Gain                        | 29 (6%)   | 61 ± 13.5                                |                             | 97 ± 1.2                                |                            |
| No gain/ not amp            | 424 (93%) | 86 ± 2.3                                 |                             | 100                                     |                            |
| Loss                        | 1 (1%)    | 1 event                                  |                             |                                         |                            |
| Unknown status              | 172       |                                          |                             |                                         |                            |
| <b>INTERMEDIATE-RISK</b>    |           |                                          |                             |                                         |                            |
| <b>ALK mutation</b>         |           |                                          |                             |                                         |                            |
| At least one                | 23 (8%)   | 69 ± 14.5                                | 0.02                        | 96 ± 6.8                                | 0.83                       |
| No mutation                 | 263 (92%) | 87 ± 2.8                                 |                             | 94 ± 1.9                                |                            |
| Unknown                     | 6         |                                          |                             |                                         |                            |
| <b>Site of ALK mutation</b> |           |                                          | 0.02                        |                                         | 0.02                       |
| F1174                       | 7 (30%)   | 86 ± 18.7                                |                             | 100                                     |                            |
| F1245                       | 2 (9%)    | 2 events                                 |                             | 50 ± 35.4                               |                            |
| R1275                       | 13 (57%)  | 68 ± 19.2                                |                             | 100                                     |                            |
| Other mutation              | 1 (4%)    | 100                                      |                             | 100                                     |                            |
| <b>ALK Copy Number</b>      |           |                                          | 0.63                        |                                         | 0.14                       |
| Amplified                   | 0 (0%)    |                                          |                             | 87 ± 8.6                                |                            |
| Gain                        | 27 (11%)  | 81 ± 9.8                                 |                             | 96 ± 2.0                                |                            |
| No gain/ not amp            | 214 (89%) | 85 ± 3.4                                 |                             |                                         |                            |
| Loss                        | 0 (0%)    |                                          |                             |                                         |                            |
| Unknown status              | 51        |                                          |                             |                                         |                            |
| <b>HIGH-RISK</b>            |           |                                          |                             |                                         |                            |
| <b>ALK mutation</b>         |           |                                          |                             |                                         |                            |
| At least one                | 65 (10%)  | 29 ± 7.4                                 | 0.06                        | 36 ± 8.7                                | 0.06                       |
| No mutation                 | 595 (90%) | 41 ± 2.7                                 |                             | 47 ± 2.7                                |                            |
| Unknown                     | 4         |                                          |                             |                                         |                            |
| <b>Site of ALK mutation</b> |           |                                          | 0.34                        |                                         | 0.47                       |
| F1174                       | 24 (37%)  | 21 ± 13.4                                |                             | 31 ± 18.0                               |                            |
| F1245                       | 7 (11%)   | 17 ± 15.2                                |                             | 17 ± 15.2                               |                            |
| R1275                       | 23 (35%)  | 33 ± 12.0                                |                             | 38 ± 13.4                               |                            |
| Other mutation              | 11 (17%)  | 46 ± 19.4                                |                             | 55 ± 21.2                               |                            |
| <b>ALK Copy Number</b>      |           |                                          | 0.12                        |                                         | 0.03                       |
| Amplified                   | 24 (4%)   | 24 ± 12.2                                |                             | 23 ± 11.7                               |                            |
| Gain                        | 138 (22%) | 37 ± 5.1                                 |                             | 46 ± 5.4                                |                            |
| No gain/ not amp            | 461 (73%) | 42 ± 3.1                                 |                             | 48 ± 3.1                                |                            |
| Loss                        | 5 (1%)    | 50 ± 35.4                                |                             | 50 ± 35.4                               |                            |
| Unknown status              | 36        |                                          |                             |                                         |                            |

<sup>a</sup>Event-free survival.

<sup>b</sup>Overall survival.

**Table S4, related to Figure 3.**  
**Kinetic Properties of Non-phosphorylated ALK TKD Variants.**

| Variant                | Constitutively active? | Location    | $k_{cat}$<br>( $\text{min}^{-1}$ ) <sup>c</sup> | $K_{M, ATP}$<br>( $\text{mM}$ ) <sup>c</sup> | $k_{cat}/K_{M, ATP}$<br>( $\text{min}^{-1}\cdot\text{mM}^{-1}$ ) | $k_{cat}/K_{M, peptide}$<br>( $\text{min}^{-1}\cdot\text{mM}^{-1}$ ) <sup>c</sup> |
|------------------------|------------------------|-------------|-------------------------------------------------|----------------------------------------------|------------------------------------------------------------------|-----------------------------------------------------------------------------------|
| Wild-type <sup>a</sup> | No                     | --          | 9.32 ± 0.85                                     | 0.134 ± 0.007                                | 69.6                                                             | 3.41 ± 0.44                                                                       |
| M1166R                 | Yes                    | αC/A-loop   | 127 ± 26                                        | 0.149 ± 0.004                                | 852                                                              | 29.0 ± 3.6                                                                        |
| I1170N                 | Yes                    | αC/A-loop   | 200 ± 59                                        | 0.297 ± 0.015                                | 673                                                              | 65.1 ± 5.7                                                                        |
| I1170S                 | Yes                    | αC/A-loop   | 200 ± 14                                        | 0.371 ± 0.013                                | 539                                                              | 71.5 ± 6.5                                                                        |
| I1171N                 | Yes                    | αC/A-loop   | 188 ± 34                                        | 0.250 ± 0.013                                | 752                                                              | 46.0 ± 4.6                                                                        |
| R1275Q <sup>a</sup>    | Yes                    | αC/A-loop   | 119 ± 13                                        | 0.326 ± 0.033                                | 365                                                              | 46.8 ± 1.9                                                                        |
| Y1278S                 | Yes                    | αC/A-loop   | 172 ± 22                                        | 0.152 ± 0.012                                | 1132                                                             | 35.8 ± 2.8                                                                        |
| G1286R                 | Slightly               | A-loop      | 16.4 ± 1.4                                      | 0.152 ± 0.006                                | 108                                                              | 3.63 ± 0.50                                                                       |
| F1174L <sup>a</sup>    | Yes                    | Phe core    | 365 ± 61                                        | 0.127 ± 0.011                                | 2874                                                             | 39.7 ± 2.8                                                                        |
| F1245C                 | Yes                    | Phe core    | 329 ± 65                                        | 0.138 ± 0.001                                | 2384                                                             | 86.8 ± 6.8                                                                        |
| F1245V                 | Yes                    | Phe core    | 341 ± 36                                        | 0.152 ± 0.009                                | 2243                                                             | 88.6 ± 10.8                                                                       |
| G1128A                 | Slightly               | P-loop      | 43.4 ± 13.8                                     | 0.152 ± 0.008                                | 286                                                              | 21.3 ± 3.0                                                                        |
| T1151M                 | Slightly               | N-lobe      | 53.4 ± 7.3                                      | 0.267 ± 0.018                                | 200                                                              | 12.4 ± 0.4                                                                        |
| I1183T                 | Slightly               | N-lobe      | 31.5 ± 5.6                                      | 0.158 ± 0.018                                | 199                                                              | 2.47 ± 1.19                                                                       |
| R1192P                 | Yes                    | N-lobe      | 139 ± 33                                        | 0.192 ± 0.007                                | 724                                                              | 25.6 ± 1.5                                                                        |
| L1196M                 | Slightly               | Active site | 45.0 ± 9.7                                      | 0.387 ± 0.033                                | 116                                                              | 13.1 ± 2.0                                                                        |
| A1200V                 | No                     | Active site | 11.1 ± 0.9                                      | 0.208 ± 0.009                                | 53.4                                                             | 1.76 ± 0.28                                                                       |
| D1270G                 | No (inactivating)      | Active site | 0.923 ± 0.306                                   | 0.153 ± 0.019                                | 6.03                                                             | 0.267 ± 0.102                                                                     |
| L1204F <sup>b</sup>    | Slightly               | C-lobe      | 27.7 ± 1.1                                      | 0.159 ± 0.002                                | 174                                                              | 5.02 ± 0.19                                                                       |
| R1231Q                 | No                     | C-lobe      | 5.35 ± 1.05                                     | 0.143 ± 0.015                                | 37.4                                                             | 1.23 ± 0.23                                                                       |
| I1250T <sup>b</sup>    | No (inactivating)      | C-lobe      | 2.68 ± 0.18                                     | 0.150 ± 0.008                                | 17.9                                                             | 0.443 ± 0.045                                                                     |
| T1343I                 | No                     | C-lobe      | 8.57 ± 1.27                                     | 0.160 ± 0.007                                | 53.6                                                             | 2.81 ± 0.17                                                                       |
| D1349H                 | No                     | C-lobe      | 11.2 ± 1.8                                      | 0.148 ± 0.014                                | 75.7                                                             | 1.65 ± 0.02                                                                       |

<sup>a</sup>Previously determined (Bresler et al., 2011).

<sup>b</sup>Expression levels approximately 10-fold less than wild-type.

<sup>c</sup>Values are the mean ± SEM of at least three experiments.

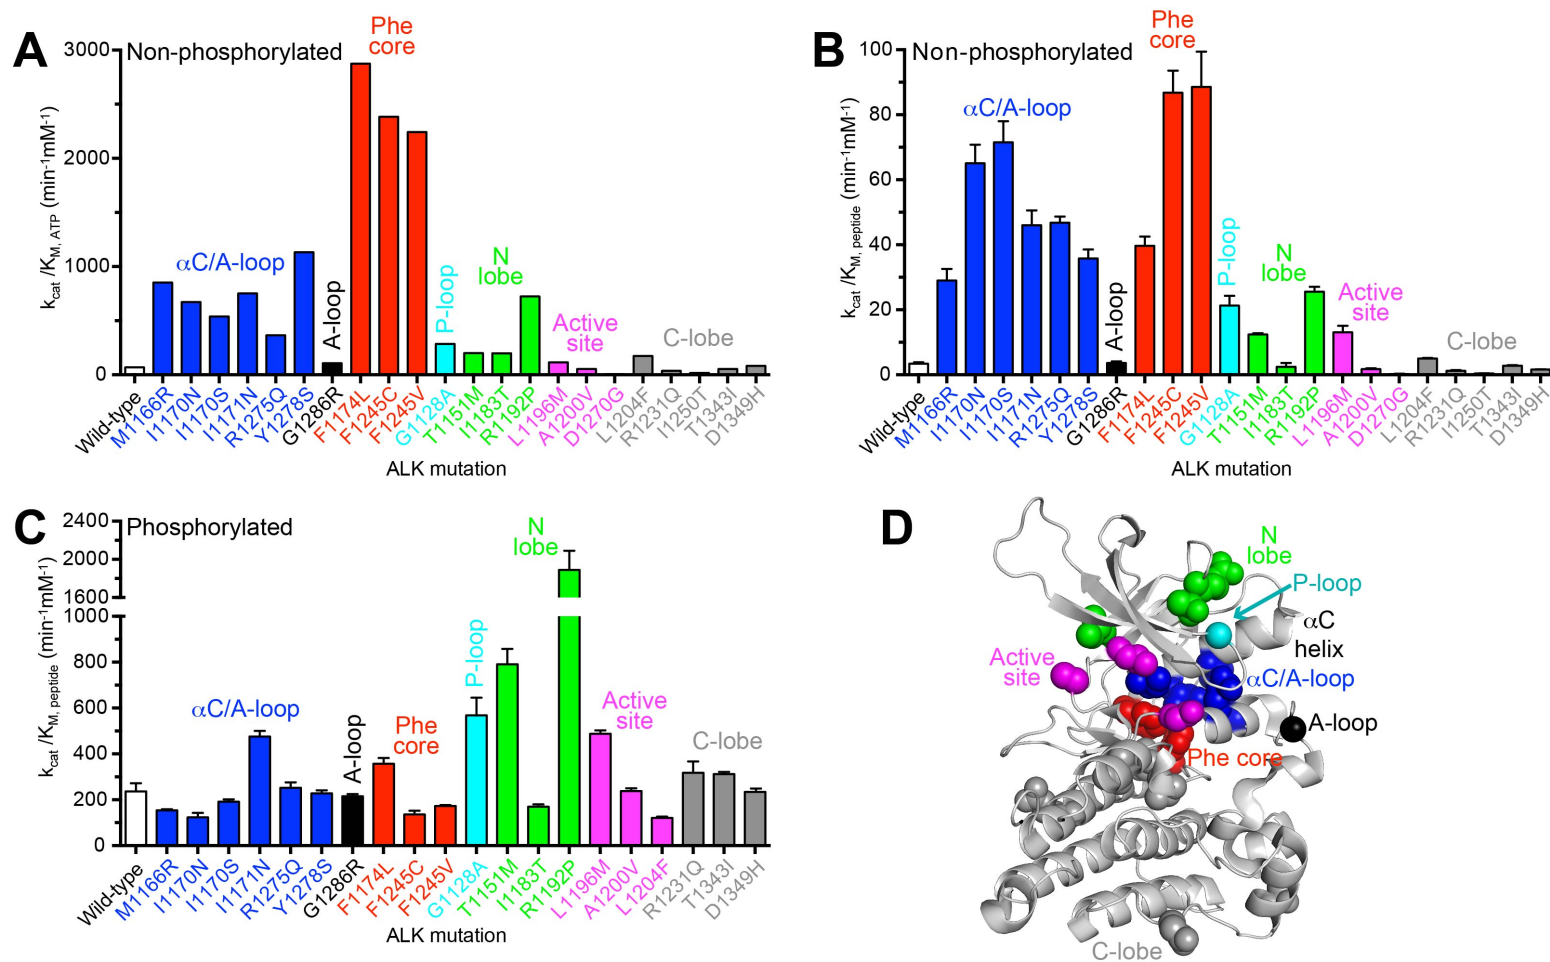

**Figure S2, related to Figure 3.**  
**Catalytic Efficiencies of ALK TKD Variants.**

(A)  $k_{cat}/K_{M,ATP}$  values for non-phosphorylated ALK TKD variants (N.B. error bars not present because  $k_{cat}$  and  $K_{M,ATP}$  were determined separately, see Table S4). (B)  $k_{cat}/K_{M,peptide}$  values for non-phosphorylated ALK TKD variants. (C)  $k_{cat}/K_{M,peptide}$  values for phosphorylated ALK TKD variants. Data (obtained at 25°C) are shown as the mean  $\pm$  SEM for at least 3 independent experiments. (D) Crystal structure of ALK TKD as also shown in Figure 3D.

**Table S5, related to Figure 3.**  
**Kinetic Properties of Phosphorylated ALK TKD Variants.**

| Variant <sup>c</sup>    | Location    | $k_{cat}$<br>(min <sup>-1</sup> ) <sup>d</sup> | $k_{cat}/K_{M, peptide}$<br>(min <sup>-1</sup> ·mM <sup>-1</sup> ) <sup>d</sup> |
|-------------------------|-------------|------------------------------------------------|---------------------------------------------------------------------------------|
| pWild-type <sup>a</sup> | --          | 424 ± 63                                       | 237 ± 35                                                                        |
| pM1166R                 | αC/A-loop   | 461 ± 22                                       | 154 ± 5                                                                         |
| pI1170N                 | αC/A-loop   | 150 ± 28                                       | 123 ± 20                                                                        |
| pI1170S                 | αC/A-loop   | 287 ± 12                                       | 192 ± 10                                                                        |
| pI1171N                 | αC/A-loop   | 542 ± 29                                       | 476 ± 24                                                                        |
| pR1275Q <sup>a</sup>    | αC/A-loop   | 347 ± 15                                       | 252 ± 24                                                                        |
| pY1278S                 | αC/A-loop   | 477 ± 35                                       | 228 ± 13                                                                        |
| pG1286R                 | A-loop      | 453 ± 6                                        | 215 ± 10                                                                        |
| pF1174L <sup>a</sup>    | Phe core    | 436 ± 51                                       | 357 ± 25                                                                        |
| pF1245C                 | Phe core    | 302 ± 20                                       | 136 ± 16                                                                        |
| pF1245V                 | Phe core    | 286 ± 24                                       | 173 ± 4                                                                         |
| pG1128A                 | P-loop      | 455 ± 66                                       | 568 ± 77                                                                        |
| pT1151M                 | N-lobe      | 722 ± 46                                       | 791 ± 67                                                                        |
| pI1183T                 | N-lobe      | 362 ± 33                                       | 170 ± 10                                                                        |
| pR1192P                 | N-lobe      | 828 ± 63                                       | 1890 ± 200                                                                      |
| pL1196M                 | Active site | 215 ± 38                                       | 488 ± 15                                                                        |
| pA1200V                 | Active site | 410 ± 23                                       | 238 ± 12                                                                        |
| pL1204F <sup>b</sup>    | C-lobe      | 251 ± 19                                       | 121 ± 5                                                                         |
| pR1231Q                 | C-lobe      | 348 ± 67                                       | 318 ± 49                                                                        |
| pT1343I                 | C-lobe      | 415 ± 9                                        | 312 ± 10                                                                        |
| pD1349H                 | C-lobe      | 404 ± 10                                       | 234 ± 15                                                                        |

<sup>a</sup>Previously determined (Bresler et al., 2011).

<sup>b</sup>Expression level approximately 10-fold less than wild-type.

<sup>c</sup>D1270G and I1250T not analyzed due to limited ability to autophosphorylate.

<sup>d</sup>Values are the mean ± SEM of at least three experiments.

**Table S6, related to Figure 4.**

**Quantitation of Focus Formation Assays for Intact ALK Variants in NIH 3T3 Cells.**

| Variant      | Transforming? | Location          | foci per colony<br>(mean $\pm$ SEM) <sup>a</sup> | p      |
|--------------|---------------|-------------------|--------------------------------------------------|--------|
| Wild-type    | No            | --                | 0.000263 $\pm$ 8.81e-5                           | --     |
| Vector alone | No            | --                | 0.000314 $\pm$ 0.000314                          | 0.883  |
| R1060H       | No            | JM region         | 0.000629 $\pm$ 0.000210                          | 0.184  |
| M1166R       | <b>Yes</b>    | $\alpha$ C/A-loop | 0.0124 $\pm$ 0.00299                             | 0.0156 |
| I1170N       | <b>Yes</b>    | $\alpha$ C/A-loop | 0.0398 $\pm$ 0.00592                             | 0.0024 |
| I1170S       | <b>Yes</b>    | $\alpha$ C/A-loop | 0.0508 $\pm$ 0.00832                             | 0.0037 |
| I1171N       | <b>Yes</b>    | $\alpha$ C/A-loop | 0.0446 $\pm$ 0.0111                              | 0.0164 |
| R1275Q       | <b>Yes</b>    | $\alpha$ C/A-loop | 0.0427 $\pm$ 0.00509                             | 0.0110 |
| Y1278S       | <b>Yes</b>    | $\alpha$ C/A-loop | 0.0491 $\pm$ 0.0130                              | 0.0199 |
| G1286R       | No            | A-loop            | 0.00107 $\pm$ 0.000509                           | 0.195  |
| F1174L       | <b>Yes</b>    | Phe core          | 0.0783 $\pm$ 0.0164                              | 0.0101 |
| L1240V       | <b>Yes</b>    | Phe core          | 0.0380 $\pm$ 0.00823                             | 0.0117 |
| F1245C       | <b>Yes</b>    | Phe core          | 0.0828 $\pm$ 0.0106                              | 0.0015 |
| F1245V       | <b>Yes</b>    | Phe core          | 0.106 $\pm$ 0.0186                               | 0.0054 |
| G1128A       | <b>Yes</b>    | P-loop            | 0.0271 $\pm$ 0.00839                             | 0.0428 |
| T1151M       | No            | N-lobe            | 0.00146 $\pm$ 0.000311                           | 0.0207 |
| I1183T       | No            | N-lobe            | 0.00296 $\pm$ 0.00271                            | 0.376  |
| R1192P       | <b>Yes</b>    | N-lobe            | 0.0533 $\pm$ 0.0124                              | 0.0130 |
| L1196M       | <b>Yes</b>    | Active site       | 0.0248 $\pm$ 0.00523                             | 0.0151 |
| A1200V       | No            | Active site       | 0.00158 $\pm$ 0.00131                            | 0.373  |
| D1270G       | No            | Active site       | 0.000149 $\pm$ 0.000149                          | 0.545  |
| L1204F       | No            | C-lobe            | 0.000117 $\pm$ 6.16e-5                           | 0.247  |
| R1231Q       | No            | C-lobe            | 3.31e-5 $\pm$ 3.31e-5                            | 0.0709 |
| I1250T       | No            | C-lobe            | 0.000529 $\pm$ 0.000125                          | 0.157  |
| T1343I       | No            | C-lobe            | 0.00110 $\pm$ 0.000351                           | 0.0821 |
| D1349H       | No            | C-lobe            | 0.00149 $\pm$ 0.000478                           | 0.0656 |

<sup>a</sup>Values are the mean  $\pm$  SEM of at least three experiments (each performed in duplicate).



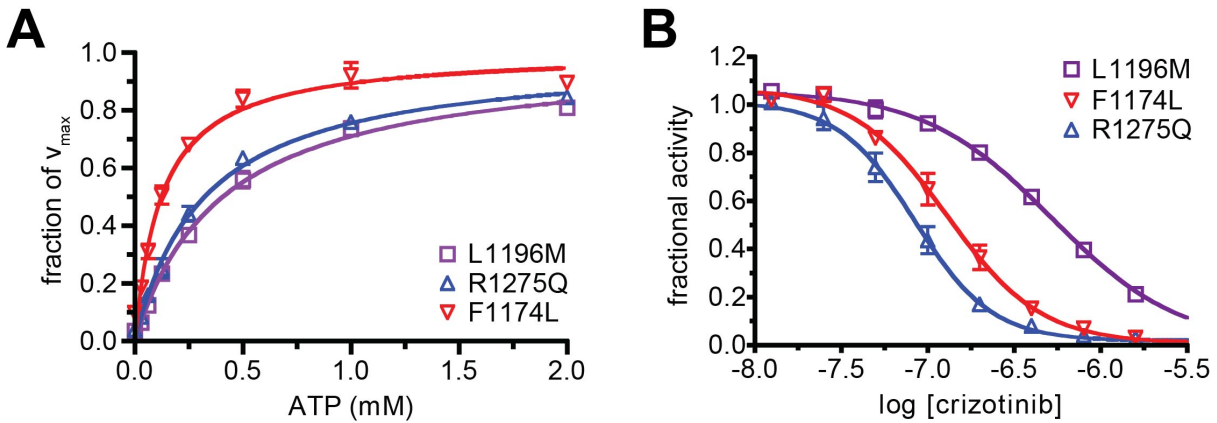

**Figure S3, related to Table 3.**

**The L1196M Mutant is Crizotinib-Resistant Despite its high  $K_{M, ATP}$ .**

(A) The L1196M mutant displays a  $K_{M, ATP}$  value that approximates that of R1275Q.  $K_{M, ATP}$  was measured at a constant YYY peptide concentration of 1.0 mM while varying the concentration of ATP. Enzyme concentrations were held at 50nM with an  $MgCl_2$  concentration of 10 mM. (B) The L1196M mutation confers resistance to crizotinib ( $IC_{50} = 521 \pm 4$  nM, ~3.5-fold higher than wild-type or F1174L as reported in Table 3). Here, the concentration of crizotinib was varied from 0 to 25600 nM with an ATP concentration of 2.0 mM and a YYY peptide concentration of 1.0 mM. The enzyme concentration was held fixed at 50 nM. Results are the mean  $\pm$  SEM of at least 3 independent experiments.

## **Supplemental Experimental Procedures**

### ***ALK* copy number determination**

Two datasets were used for copy number determination. Whole-genome SNP-array analyses (550k) were performed on 577 samples. Real-time quantitative PCR was performed on 1122 samples. The amplicon for *ALK* was located at 2p23.2a on intron 7 (Hs04707769\_cn, Applied Biosystems). One reference amplicon, in the exonic region of *AGPS* (a unique, single-copy gene encoding alkylglycerone phosphate synthase) located at 2q31.2a, was used (Hs00927032\_s1, Applied Biosystems), and was shown to have no independent copy number changes among 701 tumors analyzed. Two normal control DNA samples were used. After internal normalization, test samples were calculated for relative copy number of the *ALK* and *AGPS* amplicons. Values were calibrated to normal DNA and checked against ploidy to ensure appropriate copy number assignment. Ratios of less than 1.4 were interpreted as loss, and those greater than 2.5 were interpreted as gain, as described (D'Haene et al., 2010). A ratio of greater than 7 was interpreted as amplification. For 324 samples with overlapping SNP and real-time data, there was greater than 95% concordance of copy number evaluation. Samples with copy number data were analyzed only when there was overlapping mutation information.

### **Statistical considerations**

For univariable analyses, event-free survival (EFS) time was calculated from the time of enrollment on the front-line or biologic study until the time of first occurrence of relapse, progressive disease, secondary malignancy, or death, or until the time of last contact if no event occurred. Overall survival (OS) time was calculated until the time of death, or until last contact if the patient was still alive. The methods of Kaplan-Meier were used to generate survival curves, and curves were compared using a log rank test ( $p$  values less than 0.05 were considered statistically significant). EFS and OS are expressed as the 5-year estimate  $\pm$  the standard error,

with standard errors calculated using the methods of Peto. A chi-squared test was performed to test association between each risk factor and presence of *ALK* mutation, presence of *ALK* copy number variation, and presence of any *ALK* aberration. *p* values were not adjusted for multiple comparisons, with  $p < 0.05$  considered statistically significant. *ALK* mutations were categorized as F1174, F1245, R1275, or 'other'. Information for mutations and copy number alterations was combined into a new variable for *ALK* aberration, defined as mutation versus amplification, gain, or loss in *ALK* copy number.

For the multivariable analysis, using backwards selection model building, a Cox proportional hazards regression model was used to test for the independent statistical significance of *ALK* mutations or copy number variations after adjustment for statistically significant risk factors, and to calculate the *p* value and hazard ratio (HR) for each factor.

### **Recombinant protein expression, purification, and analysis of stability**

Mutations were introduced using the QuikChange method (Stratagene). *ALK* TKD was treated with 1  $\mu$ M YopH phosphatase, purified essentially as described (Zhang et al., 1992), for 12 hr at 4°C to reverse spontaneous autophosphorylation that occurs within Sf9 cells during expression. Protein concentrations were determined by absorbance at 280 nm using the calculated extinction coefficient 39440  $\text{cm}^{-1}\text{M}^{-1}$ . To test for a general effect of *ALK* TKD mutations on protein stability, we used circular dichroism to monitor unfolding as a function of temperature for wild-type protein and five different variants (M1166R, R1275Q, F1174L, R1192P, L1196M), and found that the melting temperature (47.4°C for wild-type) was not reduced by more than 3.1°C for any mutation (not shown).

## Peptide phosphorylation and inhibition assays

Substrate phosphorylation by ALK TKD – and its inhibition by crizotinib – was analyzed exactly as described (Bresler et al., 2011), employing a peptide mimic of the ALK activation loop with sequence: biotin-ARDIYRASYYRKGGCAMLVK referred to as ‘YYY’ peptide (Donella-Deana et al., 2005). Enzyme concentrations for non-phosphorylated proteins were 50nM for activating mutants (M1166R, I1170N, I1170S, I1171N, R1275Q, Y1278S, F1174L, F1245V, G1128A, R1192P, L1196M), 100 nM for T1151M, and 500 nM for wild-type-like mutants (G1286R, A1200V, L1204F, R1231Q, T1343I, and D1349H). D1270G was used at a concentration of 2  $\mu$ M, and I1250T at 500 nM. Enzyme concentration for all phosphorylated proteins was fixed at 10 nM. Assays monitored incorporation of  $^{32}$ P from  $\gamma$ - $^{32}$ P ATP included at trace amounts in the reactions ( $\sim$ 20  $\mu$ Ci per experiment). Peptide concentrations were determined by absorbance at 280 nm using a calculated extinction coefficient 3960  $\text{cm}^{-1}\text{M}^{-1}$ . Since  $K_{M, \text{peptide}}$  values were high ( $> 1$  mM), and the assay did not perform well with peptide substrate concentrations greater than  $\sim$ 3 mM,  $k_{\text{cat}}/K_{M, \text{peptide}}$  (catalytic efficiency) values were determined at lower peptide concentrations (where  $[\text{peptide}] < K_{M, \text{peptide}}$ ) with linear fits to the equation:  $V \sim (k_{\text{cat}}/K_{M, \text{peptide}})[\text{Enz}][\text{peptide}]$ , and  $K_{M, \text{peptide}}$  values were not directly measured.

## Native gel kinase assays

Native gel electrophoresis was used to monitor autophosphorylation progress for 10  $\mu$ M ALK TKD in 100 mM HEPES pH 7.4, 150 mM NaCl, 2 mM DTT, 2 mM ATP, 10 mM  $\text{MgCl}_2$ . A 10  $\mu$ l aliquot was taken at each time point, the reaction quenched by adding EDTA to a final concentration of 20 mM EDTA, and placed on ice. Samples (10  $\mu$ l) were then subjected to electrophoresis on 7.5% large-format (20 cm x 20 cm x 1 mm) native gels, with a pH 6.8 Tris-HCl stacking gel and a pH 8.8 Tris-HCl resolving gel, run using Tris-glycine running buffer (pH 8.8) at 100 V for  $\sim$ 14 hr. Gels were stained with Coomassie brilliant blue R-250.

## **Focus formation assays**

Low-passage NIH 3T3 cells were cotransfected with ALK variants subcloned into the MigR1 vector (Pear et al., 1998) and pSVneo DNA in a 10:1 ratio using Lipofectamine 2000 (Invitrogen) according to the manufacturer's protocol. The cells were allowed to recover for 2 days post-transfection, and were then divided into 2 samples and placed into 6-well plates. The first sample was allowed to reach confluence and form foci in DMEM containing 5% calf serum, while the second sample of cells was serially diluted and selected for colony formation in DMEM containing 10% calf serum and 0.5 mg/ml G418. The medium was changed every 3 days. After focus formation in the first group and colony formation in the second group, which typically took 10-14 days, cells were fixed in 3.7% formaldehyde in PBS for 5 min and then stained with 0.05% crystal violet. Foci and colonies were counted, and the number of foci counted for each ALK variant in each transfection was normalized by the number of G418-resistant colonies counted (correcting for dilution), to yield a transformation index as foci per G418-resistant colony. Each independent experiment was performed in duplicate. Final data (Figure 4B and Table S6) represent the mean and SEM of at least three independent experiments. Expression controls in parallel transfections established similar levels of expression for the different mutants by Western blotting (not shown).

## **Modeling methods**

The inactive wild-type ALK TKD structure (residues 1096-1399) was taken from PDB entry 3LCS (Lee et al., 2010). Residues 1084-1095 and 1400-1405 were added to the model based on PDB entry 4FNW (Epstein et al., 2012) using MODELLER v9.8 (Eswar et al., 2006). Mutated structures were generated using MODELLER v9.8 by making point mutations to the modified inactive wild-type model. A homology model of active ALK TKD was generated with MODELLER v9.8, using as the primary template the active insulin receptor TKD structure (PDB entry 1IR3),

with which ALK TKD shares 46% sequence identity (Hubbard, 1997). Residues 1097-1399 were modeled from 3LCS, whereas residues 1084-1096 and 1400-1405 were again modeled from 4FNW. All structures were modeled without bound substrate.

### **Molecular dynamics (MD)**

All structures were subjected to the same molecular dynamics (MD) protocol. Hydrogen atoms were added to the structures with Automatic PSF Generation Plugin v1.3 implemented in VMD 1.8.6 (Humphrey et al., 1996). To reflect a physiological pH of 7.0, all histidines express a +1 protonation state on the  $\delta$ -nitrogen. The Solvate Plugin v1.5 and Autoionize Plugin v1.3 implemented in VMD were used to construct an electroneutral water box with 15 Å TIP3P water padding and 0.15 M Na<sup>+</sup>/Cl<sup>-</sup> concentration. All Na<sup>+</sup> and Cl<sup>-</sup> ions were placed at least 5 Å away from protein atoms and each other. Systems contained approximately 60500 atoms.

All MD simulations were carried out with NAMD v2.8 (Phillips et al., 2005) using CHARMM27 force field parameters (MacKerell Jr et al., 1998). Periodic boundary conditions were used throughout. The particle mesh Ewald algorithm was used to treat long-range electrostatic interactions. An integration timestep of 2 fs was used. Bonds between hydrogens and heavy atoms were constrained to their equilibrium values, with the velocity correction being performed by the RATTLE algorithm (Anderson, 1983). Rigid waters were treated using the SETTLE algorithm (Miyamoto and Kollman, 1992). Long-range non-bonded van der Waals (VDW) interactions were treated by applying a smooth switching function at 10 Å with a cutoff distance of 12 Å.

To eliminate unfavorable contacts, the solvated systems underwent an energy minimization using a conjugate gradient algorithm; they were then gradually heated to 300 K. Constant temperature and pressure (NPT) simulations using a Nosé-Hoover Langevin piston (Feller et al., 1995; Martyna et al., 1994) were performed at 300 K and 1 atm to equilibrate the

volume of the solvation box. Subsequently, constant temperature and volume (NVT) simulations were run on the system. After an equilibration period, 40 ns of NVT simulation were completed on each structure.

### Hydrogen-bond analysis

Hydrogen bond (H-bond) analysis was performed on the trajectory of each system using the HBonds Plugin v1.2 in VMD. Hydrogen-bond cutoff lengths of 3.2 Å and angle cutoffs of 30° were chosen to include H-bonds of moderate strength. The occupancies for each residue-to-residue H-bond range from 0% to 100% across the trajectory in each system. Full details of the analysis will be published separately (Huwe et al., in preparation).

A scoring function was created to analyze how ‘active-like’ the hydrogen bond networks were for each system, as follows:

1. For each hydrogen bond, the difference in occupancies between the active (A) and inactive (I) wild-type (wt) systems ( $\Delta_{wt} = Y_{wt}^I - Y_{wt}^A$ ) was calculated.
2. For each bond, if  $|\Delta_{wt}| > 40.0\%$ , the difference in occupancies between the inactive wt and inactive mutant (mut) for each mutation ( $\Delta_{mut} = Y_{wt}^I - Y_{mut}^I$ ) was calculated.
3. If  $\Delta_{mut}/\Delta_{wt} > 0.5$ , then the bond received a binary activation score of 1; otherwise, it received a score of 0.

The scores were tallied for 28 hydrogen bonds in the activation loop and the  $\alpha$ C helix. A score of 5 or greater for a given variant was considered activating.

### Hydrophobic destabilization analysis

Solvent accessible surface area (SASA) values (Connolly, 1983) were calculated in VMD using the measure SASA module, with a probe radius 1.4 Å larger than the van der Waals radius. The SASA was calculated on a per-residue basis for the residues forming the hydrophobic core

involving the activation loop,  $\alpha$ C helix, and extended 'Phe core' (Y1096, F1098, I1170, I1171, F1174, I1179, Y1239, L1240, F1245, and F1271). The SASA values (in units of  $\text{\AA}^2$ ) were averaged over all steps of the MD trajectory, from which mean SASA values were computed for each relevant amino acid. These SASA scores were summed and compared to the summed score for the wild-type protein.

Additionally, free energy perturbation (FEP) simulations (Beveridge and DiCapua, 1989) were performed for each mutant on the inactive and active ALK TKD structures to determine computationally how each mutation affects the relative stability of the two TKD conformations. We used the dual-topology approach of FEP as implemented in NAMD (Axelsen and Li, 1998; Gao et al., 1989; Phillips et al., 2005). The potential energy function characteristic of the native residue is scaled into that representing the new residue over the course of an MD simulation. As the old residue fades out and the new residue fades in, the old and new do not interact with each other. Simulations were carried out in both the forward and reverse directions, with soft-core potentials employed to avoid "end-point catastrophes" (Beutler et al., 1994). Forward direction  $\Delta\Delta G$  are calculated using the following equation:  $\Delta\Delta G = \Delta G_{wt \rightarrow mut}^{active} - \Delta G_{wt \rightarrow mut}^{inactive}$ . Forward  $\Delta\Delta G$  values are only considered significant if the  $\Delta\Delta G$  value is greater than the standard deviation between the forward and reverse results. Mutated systems were scored as activating in the SASA/FEP column of Table 4 if the following are true:

1. The summed SASA values for the residues that contribute to the hydrophobic core mentioned above are at least  $25 \text{\AA}^2$  greater for the mutant than for wild-type ALK TKD.
2. The FEP results yielded a statistically significant negative value for  $\Delta\Delta G$ .



### **Principal component analysis (PCA)**

Principal Component Analysis (PCA) as implemented in Carma (Glykos, 2006) was performed on the full trajectories of each system. Principal components were obtained by diagonalizing the covariance matrix of atomic fluctuations in Cartesian space to produce eigenvalues and eigenvectors. Only  $\alpha$  carbons of protein components were analyzed. Translations and rotations were removed by aligning all residues that were not in the activation loop, P-loop, catalytic loop, or  $\alpha$ C helix. Eigenvalues were summed for each system and ranged from 287 to 595  $\text{\AA}^2$ . Every mutant with a top eigenvalue above 200  $\text{\AA}^2$  was given an 'activating' score in Table 4.

## Supplemental References

Anderson, H.C. (1983). Rattle: A “velocity” version of the shake algorithm for molecular dynamics calculations. *J. Comp. Phys.* *52*, 24–34.

Axelsen, P.H., and Li, D. (1998). Improved convergence in dual-topology free energy calculations through use of harmonic restraints. *J. Comput. Chem.* *19*, 1278-1283.

Beutler, T.C., Mark, A.E., van Schaik, R.C., Gerber, P.R., and van Gunsteren, W.F. (1994). Avoiding singularities and numerical instabilities in free energy calculations based on molecular simulations. *Chem. Phys. Lett.* *222*, 529-539.

Beveridge, D.L., and DiCapua, F.M. (1989). Free energy via molecular simulation: Applications to chemical and biomolecular systems. *Annu. Rev. Biophys.* *18*, 431-492.

Connolly, M.L. (1983). Solvent-accessible surfaces of proteins and nucleic acids. *Science* *221*, 709-713.

D'Haene, B., Vandesompele, J., and Hellemans, J. (2010). Accurate and objective copy number profiling using real-time quantitative PCR. *Methods* *50*, 262-270.

Donella-Deana, A., Marin, O., Cesaro, L., Gunby, R.H., Ferrarese, A., Coluccia, A.M., Tartari, C.J., Mogni, L., Scapozza, L., Gambacorti-Passerini, C., and Pinna, L.A. (2005). Unique substrate specificity of anaplastic lymphoma kinase (ALK): development of phosphoacceptor peptides for the assay of ALK activity. *Biochemistry* *44*, 8533-8542.

Epstein, L.F., Chen, H., Emkey, R., and Whittington, D.A. (2012). The R1275Q neuroblastoma mutant and certain ATP-competitive inhibitors stabilize alternative activation loop conformations of anaplastic lymphoma kinase. *J. Biol. Chem.* *287*, 37447-37457

Eswar, N., Marti-Renom, M.A., Webb, B., Madhusudhan, M.S., Eramian, D., Shen, M., Pieper, U., and Sali, A. (2006). Comparative protein structure modeling with MODELLER. *Current Protocols in Bioinformatics Supplement 15*, 5.6.1-5.6.30.

Feller, S.E., Zhang, Y., Pastor, R.W., and Brooks, B.R. (1995). Constant pressure molecular dynamics simulation: The Langevin piston method. *J. Chem. Phys.* *103*, 4613-4621.

Gao, J., Kuczera, K., Tidor, B., and Karplus, M. (1989). Hidden thermodynamics of mutant proteins: A molecular dynamics analysis. *Science* *244*, 1069-1072.

Glykos, N.M. (2006). Carma: a molecular dynamics analysis program. *J. Comput. Chem.* *27*, 1765-1768

Hubbard, S.R. (1997). Crystal structure of the activated insulin receptor tyrosine kinase in complex with peptide substrate and ATP analog. *EMBO J.* *16*, 5572-5581.

Humphrey, W., Dalke, A., and Schulten, K. (1996). VMD - Visual Molecular Dynamics. *J. Molec. Graphics* *14*, 33-38.

MacKerell Jr, A.D., Bashford, D., Bellott, M., Dunbrack Jr., R.L., Evanseck, J.D., Field, M.J., Fischer, S., Gao, J., Guo, H., Ha, S., *et al.* (1998). All-atom empirical potential for molecular

modeling and dynamics studies of proteins. *J. Phys. Chem. B.* *102*, 3586-3616.

Martyna, G.J., Tobias, D.J., and Klein, M.L. (1994). Constant pressure molecular dynamics algorithms. *J. Chem. Phys.* *101*, 4177-4189.

Miyamoto, S., and Kollman, P.A. (1992). Settle: An analytical version of the SHAKE and RATTLE algorithm for rigid water models. *J. Comp. Chem.* *13*, 952–962.

Pear, W.S., Miller, J.P., Xu, L., Pui, J.C., Soffer, B., Quackenbush, R.C., Pendergast, A.M., Bronson, R., Aster, J.C., Scott, M.L., and Baltimore, D. (1998). Efficient and rapid induction of a chronic myelogenous leukemia-like myeloproliferative disease in mice receiving P210 bcr/abl-transduced bone marrow. *Blood* *92*, 3780-3792.

Phillips, J.C., Braun, R., Wang, W., Gumbart, J., Tajkhorshid, E., Villa, E., Chipot, C., Skeel, R.D., Kalé, L., and Schulten, K. (2005). Scalable molecular dynamics with NAMD. *J. Comput. Chem.* *26*, 1781-1802.

Zhang, Z.Y., Clemens, J.C., Schubert, H.L., Stuckey, J.A., Fischer, M.W., Hume, D.M., Saper, M.A., and Dixon, J.E. (1992). Expression, purification, and physicochemical characterization of a recombinant *Yersinia* protein tyrosine phosphatase. *J. Biol. Chem.* *267*, 23759-23766.
